# Supplementary material for: Gene Expression Signatures Predict Outcome in Non–Muscle-Invasive Bladder Carcinoma: A Multicenter Validation Study
Source: Oxford University Press journal article supplement (doi:10.1158/1078-0432.ccr-06-2940), 2007-06-15
Supplement: 10780432ccr062940-sup-supplemental_file_1.xls [file 10780432ccr062940-sup-supplemental_file_1.xls]

## Sheet: Ark1
Sample ID	Country	Progression classifier (2=progression, 1=no progression)	difference in classifier group distance	CIS classifier	difference in classifier group distance	Stage classifier	difference in classifier group distance between the two closest groups	Recurrence classifier	difference in classifier group distance	Reevaluated pathological disease stage, *no reevaluation	Reevaluated WHO grade, *no reevaluation	Reevaluated tumor configuration, *no reevaluation	clinical risk (1=high risk, 0=low risk)	CIS diagnosis (CIS=cis in more than one random biopsy in the disease course before muscle invasive tumor, or CIS in diagnostic tumor sectio for analyzed tumor)	Time to recurrence (months)	Progression (0=no progression, 1=progression to T1, 2=progression to T2+)	Follow-up (months from tumor to last visit to the clinic, or to cystectomy)	Time to progression (months)	Progression free survival	Follow-up (total)	Death cause (0=alive, 1 dead from bladder cancer, 2=other specific cause, 3=unknown cause)	Cystectomy	BCG/MMC treatment	SEX	AGE	Samples used for training progression classifier	Samples used for training CIS classifier	Samples used for training stage classifier	Samples used for training recurrence classifier	Samples used for validating progression classifier	Samples used for validating CIS classifier	Samples used for validating stage classifier
195	F	2	0.242527	2	0.301819	3	1.21611	1	-0.253007	pTa	HIGH	solid	1	ND		0	5.66667		5.66667	5.66667	1	cystectomy		F	59					1		1
259	F	2	0.0124028	2	0.277012	1	0.053393	1	-0.0795012	pT2	HIGH	papillary		ND		0	0.766667		0.766667	0.766667	1			M	59							1
281	F	1	-0.0504239	2	0.258794	2	0.272637	2	0.18257	pT2	HIGH	solid		ND		0	5.13333		5.13333	5.13333	1	cystectomy		M	58							1
319	F	1	-0.52005	2	0.0202354	1	0.565068	1	-0.196274	pTa	PUNLMP	papillary	0	ND		0	82.4667		82.4667	82.4667	0	cystectomy		M	42					1		1
324	F	1	-0.117331	2	0.195007	2	0.033496	2	0.280962	pT1a	HIGH	papillary	1	ND		0	67.8667		67.8667	67.8667	0		BCG	M	57					1		1
338	F	1	-0.00164042	1	-0.200606	2	1.16475	2	0.301256	pTa	PUNLMP	papillary	0	ND		0	39.7667		39.7667	39.7667	0		BCG	F	38					1		1
342	F	2	0.0125555	1	-0.444199	2	0.360501	2	0.457399	pTa	HIGH	papillary	1	ND		2	81.5	74.1667	74.1667	81.5	1	cystectomy	BCG	M	54					1		1
391	F	1	-0.0722164	2	0.139364	2	0.122519	1	-0.0558093	pT1	HIGH	inverted + solid, focal squamous	1	ND		0	41.3		41.3	41.3	0	cystectomy		F	72					1		1
402	F	2	0.0412438	2	0.31274	2	0.0656185	2	0.0501476	pTa	LOW	papillary	0	ND		0	160.7		160.7	160.7	0		BCG	M	72					1		1
407	F	2	0.0350142	2	0.0732318	2	0.406921	1	-0.0172732	pT1a	HIGH	papillary	1	ND		1	76.2667		76	76.2667	0		BCG	F	78					1		1
413	F	1	-0.0943481	2	0.370027	1	0.266271	2	0.0967571	pT1b	HIGH	solid	1	ND		0	41.8		41.8	41.8	1	cystectomy		M	50					1		1
431	F	1	-0.143278	2	0.303539	1	0.00720523	1	-0.075337	pT2	HIGH	solid		ND		0	44.5		44.5	44.5	2	cystectomy		M	68							1
448	F	1	-0.253685	2	0.0446288	1	0.0363809	2	0.18895	pT1a	HIGH	papillary	1	ND		2	21.2333	7.6	7.6	21.2333	1		BCG	M	79					1		1
505	F	1	-0.311598	1	-0.109511	2	0.0721093	2	0.279266	pT1b	HIGH	papillary + solid		ND		0	0		0	0	1	cystectomy		M	66							1
506	F	1	-0.274447	1	-0.303757	2	0.17351	2	0.204899	pTa	LOW	papillary	0	ND		0	140.9		140.9	140.9	2	cystectomy		M	63					1		1
508	F	1	-0.719232	1	-0.207124	1	0.0439979	2	0.126099	pTa	PUNLMP	papillary	0	ND		0	65.9333		65.9333	65.9333	0		BCG	M	58					1		1
518	F	1	-0.262332	1	-0.368785	2	0.409616	2	0.384059	pT1b	HIGH	papillary	1	ND		0	121.467		121.467	121.467	0	cystectomy	BCG	M	58					1		1
546	F	1	-0.35364	1	-0.0351038	1	0.14222	2	0.143663	pT1a	HIGH	papillary		ND		0	0		0	48	2			M	66							1
637	F	1	-0.456234	1	-0.161536	1	1.22756	2	0.427572	pTa	HIGH	papillary	1	ND		0	48		48	48	1	cystectomy		M	29					1		1
708	F	1	-0.0669817	1	-0.112503	2	0.243474	1	-0.00304127	pTa	LOW	papillary	0	ND		1	98		84	98	0			M	85					1		1
712	F	2	0.138334	2	0.239269	3	0.138992	1	-0.303304	pT2	HIGH	papillary		ND		0	1.43333		1.43333	1.43333	2			M	81							1
813	F	1	-0.571983	1	-0.314315	2	0.277756	1	-0.159413	pTa	LOW	papillary	0	ND		0	103		103	103	0		BCG	M	67					1		1
815	F	2	0.106154	2	0.13378	2	0.122124	2	0.0860867	pT2	HIGH	solid		ND		0	76.5		76.5	76.5	1	cystectomy		M	75							1
822	F	2	0.237706	2	0.215759	3	0.109396	1	-0.0458416	pT3a		solid		ND		0	9.16667		9.16667	9.16667	1	cystectomy		M	70							1
839	F	2	0.106207	2	0.191819	3	0.237064	2	0.226184	pT1b	HIGH	papillary	1	ND		0	19.5667		19.5667	19.5667	1			M	74					1		1
842	F	1	-0.68463	1	-0.0364718	1	1.28144	2	0.072481	pTa	LOW	papillary	0	ND		0	49.6		49.6	49.6	2			F	89					1		1
848	F	2	0.25803	2	0.13799	3	0.115365	2	0.0896017	pT2	HIGH	solid		ND		0	3.9		3.9	3.9	1			M	65							1
867	F	1	-0.130486	2	0.0616483	2	0.438984	2	0.0115034	pTa	LOW	papillary	0	ND		0	39.6		39.6	39.6	0			F	54					1		1
879	F	2	0.184847	2	0.251539	3	0.446393	2	0.291533	pT1b	HIGH	papillary	1	ND		0	34.3333		34.3333	34.3333	0	cystectomy		M	60					1		1
908	F	1	-0.263149	1	-0.135985	2	0.0535024	2	0.0948586	pTa	LOW	papillary	0	ND		0	96.8		96.8	96.8	0		BCG	M	57					1		1
910	F	2	0.196663	2	0.301091	2	0.123507	2	0.0252014	pT2	HIGH	solid		ND		0	18.7		18.7	18.7	1	cystectomy		M	63							1
943	F	2	0.142634	2	0.0415135	3	0.656371	2	0.431376	pT2	HIGH	solid		ND		0	94.2		94.2	94.2	2	cystectomy		F	57							1
965	F	2	0.0626683	2	0.336025	2	0.220399	2	0.238117	pT1b	HIGH	papillary + solid		ND		0	0		0	19	2		BCG	M	83							1
1033	F	2	0.111491	2	0.21946	3	0.844166	2	0.271797	pT2	HIGH	solid		ND		0	25.2		25.2	25.2	1	cystectomy		M	49							1
1195	F	2	0.255177	1	-0.072981	3	0.908422	2	0.195297	pT2	HIGH	solid		ND		0	39.1333		39.1333	39.1333	1	cystectomy		M	70							1
1379	F	1	-0.393941	2	0.0267056	2	0.0741334	2	0.070641	pTa	LOW	papillary	0	ND		0	86.1		86.1	86.1	0			M	56					1		1
1412	F	1	-0.618217	1	-0.178241	1	1.02891	1	-0.0117606	pTa	HIGH	papillary	1	ND		0	10.5667		10.5667	10.5667	0			M	57					1		1
1413	F	1	-0.765328	1	-0.379846	1	0.226949	2	0.404814	pTa	LOW	papillary	0	ND		0	42.6333		42.6333	42.6333	0		BCG	M	34					1		1
1442	F	1	-0.629732	2	0.0935775	2	0.0412505	2	0.20198	pTa	LOW	papillary	0	ND		0	49.9333		49.9333	49.9333	0			M	75					1		1
1484	F	2	0.368524	2	0.111321	3	0.610165	1	-0.253112	pT2 obs	HIGH	solid		ND		0	5.56667		5.56667	5.56667	1			F	83							1
1498	F	1	-0.119232	2	0.0418243	2	0.0202523	2	0.0525097	pTa	HIGH	papillary	1	ND		2	63.5	6.53333	6.53333	63.5	0	cystectomy		M	56					1		1
01001T_E	E	2	0.284892	1	-0.337368	3	0.105736	2	0.407181	pTa	LOW	papillary	0	ND		0	91		91	91	0		BCG	M	64					1		1
01002_E	E	2	0.401858	1	-0.160272	2	0.262671	2	0.251993	pT2	HIGH	papillary + solid		ND		0	0		0	7	1			M	63							1
01005T_E	E	1	-0.581707	1	-0.347807	1	0.377661	1	-0.0254971	pTa	PUNLMP	papillary	0	ND		0	91		91	91	0		BCG	M	54					1		1
01008T_E	E	1	-0.144495	1	-0.359844	2	0.436219	2	0.029066	pTa	LOW	papillary	0	ND		0	90		90	90	0		BCG	M	65					1		1
01009_E	E	1	-0.278704	1	-0.437997	1	0.134238	2	0.226117	pT1*	HIGH*	papillary*	1	ND		0	81		81	81	0		BCG							1		1
01012T_E	E	1	-0.680376	1	-0.198669	2	0.316798	1	-0.128542	pT2	HIGH	solid		ND		0	0		0	10	1			F	66							1
01013T_E	E	1	-0.236127	1	-0.0962427	1	1.05674	1	-0.338612	pTa	PUNLMP	papillary	0	ND		0	89		89	89	0		BCG	M	68					1		1
01015T_E	E	2	0.282769	1	-0.338963	2	0.0338798	2	0.318965	pTa	PUNLMP	papillary	0	ND		1	77		77	77	0		BCG	M	50					1		1
01016T_E	E	1	-0.0182146	1	-0.157136	2	0.817109	2	0.021764	pTa*	LOW*	papillary*	0	ND		0	91		91	91	0		BCG	M	68					1		1
01017T_E	E	2	0.309007	2	0.225165	2	0.0747669	2	0.0414728	pT4a	HIGH	papillary		ND		0	0		0	1	2		BCG	M	74							1
01018T_E	E	1	-0.0590508	2	0.0135163	1	0.110561	1	-0.401577	pTa	LOW	papillary	0	ND		0	88		88	88	0		BCG	M	76					1		1
01019T_E	E	2	0.127632	2	0.212164	2	0.0713914	1	-0.00213089	pT2	LOW	papillary		ND		0	0		0	64	3	cystectomy		M	72							1
01020T_E	E	2	0.0846326	2	0.229081	3	0.365246	2	0.0151743	pT1*	HIGH*	papillary*	1	ND		2	42	29	29	42	0	cystectomy								1		1
01022T_E	E	2	0.0751486	2	0.157389	3	0.309142	2	0.184916	pT2+pTIS	HIGH	papillary + solid		CIS		0	84		84	84	0	cystectomy		F	72							1
01025_E	E	2	0.194974	2	0.0940533	3	1.031	2	0.0427687	pT2	HIGH	solid		ND		0	0		0	14	1			M	74							1
01027_E	E	1	-0.163351	1	-0.293918	2	0.0701387	1	-0.0796539	pTa	LOW	papillary		ND		0	0		0	64	2		BCG	M	66							1
01028T_E	E	1	-0.538245	1	-0.13695	1	0.320997	1	-0.233101	pTa	PUNLMP	papillary		ND		0	0		0	76	2		BCG	M	74							1
01029T_E	E	1	-0.493283	1	-0.114663	2	0.0384768	1	-0.103479	pTa	PUNLMP	papillary	0	ND		0	85		85	85	0		BCG	M	74					1		1
01030T_E	E	1	-0.279312	1	-0.159639	2	0.453565	2	0.105429	pTa	LOW	papillary		ND		0	0		0	76	2		BCG	M	66							1
01031T_E	E	1	-0.569206	1	-0.0836062	1	0.118135	1	-0.165175	pTa	LOW	papillary	0	ND		0	84		84	84	0		BCG	M	54					1		1
01032T_E	E	1	-0.0973719	2	0.0958594	2	0.165848	1	-0.031488	pT1	HIGH	papillary	1	CIS		0	84		84	84	0			M	68					1	1	1
01033T_E	E	1	-0.304573	1	-0.115024	1	0.172086	1	-0.132766	pTa	LOW	papillary	0	ND		0	84		84	84	0			M	41					1		1
01034T_E	E	1	-0.278506	2	0.0661408	1	0.0915712	1	-0.511288	pTa	PUNLMP	papillary	0	ND		0	84		84	84	0		BCG	M	50					1		1
01035_E	E	1	-1.05349	1	-0.128791	2	0.0999376	1	-0.0256241	pTa	PUNLMP	papillary	0	ND		0	83		83	83	0		BCG	M	56					1		1
01037_E	E	1	-0.879933	1	-0.139719	2	0.145875	1	-0.074517	pTa	LOW	papillary	0	ND		0	82		82	82	0		BCG	F	65					1		1
01040_E	E	1	-0.0113892	2	0.0712561	1	0.0409702	1	-0.242462	pT2	HIGH	papillary		ND		0	0		0	65	1	cystectomy		M	57							1
01041_E	E	2	0.075583	2	0.165867	3	0.043614	2	0.0246946	pT2	HIGH	solid		ND		2	68	12	12	68	0		BCG	M	74							1
01044_E	E	1	-0.260157	2	0.0092094	1	0.544202	1	-0.398641	pTa	HIGH	papillary		ND		0	0		0	1	1		BCG	M	58							1
01046_E	E	2	0.0350095	2	0.0848128	2	0.396068	1	-0.0691594	pT2*	HIGH*	?		ND		0	0		5	5	1											1
01048_E	E	1	-0.00981503	2	0.00346745	2	0.144605	1	-0.0249204	pT1*	HIGH*	papillary*		ND		0	0		0	81	2											1
10054_S	S	1	-0.198768	2	0.0540577	1	0.0585379	2	0.0465105	pTa	HIGH	papillary	1	ND		0	41		41	45	2			M	58					1		1
1008-1	DK	1	-0.35378	1	-0.239432	2	0.574058	2	0.340363	pTa	LOW	papillary	0	no cis	5	0	66		66	67.3	0			M	69			1	1	1	1
1010-1	DK	2	0.173804	2	0.367043	3	0.161549	1	-0.104221	pT1b	HIGH	papillary	1	CIS		0	77		77	82.3333	0		BCG	F	69					1	1	1
1012-1	DK	1	-0.381167	1	-0.184785	2	0.31953	2	0.263027	pTa	LOW	papillary	0	no cis	no rec	0	38		38	65.0333	3			M	73					1	1	1
1017-1	DK	2	0.541061	2	0.217158	2	0.486476	1	-0.0875601	pT1b	HIGH	papillary		CIS		2	42	8.66667	8.66667	51.5667	1			M	79	1					1	1
102_F	F	1	-0.0342942	2	0.175992	1	0.0193118	1	-0.0791572	pT1a	HIGH	pap	1	ND		0	3		3	3	0		BCG	M	95					1		1
1022-1	DK	2	0.119467	1	-0.0754372	2	0.116764	1	-0.312983	pTa	LOW	papillary	0	no cis	no rec	0	56		56	80	0			M	61					1	1	1
1024-1	DK	2	0.222676	2	0.34595	2	0.856884	2	0.294559	pT1b	HIGH	papillary + solid	1	CIS		0	51		51	58.8333	3		BCG	M	63		1			1		1
1031-1	DK	2	0.355547	2	0.447576	2	1.1663	2	0.26416	pT1	HIGH	papillary	1	CIS		0	70		70	81.2333	0		BCG	M	68					1	1	1
1034-2	DK	2	0.145941	2	0.155021	2	0.203053	1	-0.103011	pT1	HIGH	papillary	1	CIS		0	70		70	79	0		BCG	F	74					1	1	1
1036-1	DK	2	0.112498	2	0.0178899	1	0.144424	2	0.394544	pT1a	HIGH	papillary	1	CIS		0	56		56	63.5667	3			M	79					1	1	1
10386_S	S	2	0.152653	2	0.102748	1	0.0260852	1	-0.382284	pT1b	HIGH	papillary	1	ND		0	8		8	10	2			M	76					1		1
10395_S	S	2	0.167067	2	0.28658	1	0.13621	1	-0.274188	pT1	HIGH	solid		ND		0	0		0	12	3			M	79							1
1047-1	DK	2	0.332616	2	0.144346	3	0.668774	2	0.321222	pT1a	HIGH	papillary	1	CIS		2	14	6.36667	6.36667	16.8667	1			M	76					1	1	1
105_F	F	1	-0.081397	2	0.242162	2	0.0633532	1	-0.219791	pT1a	HIGH	pap	1	ND		0	92		92	92	0		BCG	M	55					1		1
10530_S	S	1	-0.254733	2	0.170354	2	0.00943416	1	-0.382255	pTa	LOW	papillary	0	ND		0	16		16	17	1			M	63					1		1
1053-1	DK	1	-0.109962	2	0.0822438	2	0.394317	1	-0.0289088	pTa	LOW	papillary	1	CIS	12	0	77		77	79.7667	0			M	78					1	1	1
1056-4_DK	DK	2	0.236255	2	0.0958289	2	0.193378	1	-0.0418036	pT1*	HIGH*	papillary*	1	CIS		2	11	11	11	20	1			F	59					1	1	1
1058-2	DK	1	-0.359368	1	-0.0824982	1	1.04026	1	-0.226843	pTa	LOW	papillary	0	no cis	4	2	42	42	42	43	1			F	67					1	1	1
1060-1	DK	2	0.15375	1	-0.151366	2	0.51593	2	0.0653508	pTa	HIGH	papillary	1	no cis	34	0	62		62	63.5	0			M	59		1	1	1	1
1065-1	DK	2	0.390189	1	-0.208145	2	0.733449	2	0.337399	pT1	HIGH	papillary	1	no cis		0	68		68	78.8667	0			M	83			1		1	1
1066-1	DK	2	0.233903	1	-0.940224	2	0.34658	2	0.245874	pT1a	HIGH	papillary	1	no cis		0	67		67	68.8667	0			M	80		1			1		1
107_F	F	1	-0.0820822	2	0.185078	2	0.0551323	1	-0.32887	pT3a	HIGH	pap+solid		ND		0	57		57	57	0		BCG	M	56							1
1073-1	DK	1	-0.018367	1	-0.0663053	2	0.138122	1	-0.0928197	pT1	HIGH	papillary	1	no cis		0	72		72	76	0			F	65					1	1	1
1077-1	DK	2	0.102939	2	0.22032	2	0.550365	2	0.0425757	pT1a	HIGH	papillary	1	no cis		0	62		62	62.7	0			M	66					1	1	1
1078-1	DK	2	0.218159	2	0.221787	3	3.25956	2	0.0109975	pT4a/pT2	HIGH	papillary + solid		ND		0	0		0	2.26667	1			M	71			1
1082-1	DK	2	0.164145	2	0.333645	1	0.116701	1	-0.294012	pT1a	HIGH	papillary	1	CIS		2	69	69	69	76	0			F	81					1	1	1
1083-1	DK	2	0.44318	1	-0.0351895	2	0.424928	1	-0.0204382	pTa	LOW	papillary		no cis	0.5	0	1		1	62.9667	0			F	40	1		1			1
1086-1	DK	1	-0.0769141	2	0.136385	2	0.319798	2	0.291185	pTa	HIGH	papillary	1	no cis	6	0	63		63	68.1333	0			M	74				1	1	1	1
1093-1	DK	1	-0.200905	1	-0.273415	2	0.355483	1	-0.325054	pTa	HIGH	papillary	1	no cis	5	2	66	66	66	77	1		BCG	M	81		1			1		1
1105-1	DK	2	0.155465	1	-0.143347	2	1.93793	2	0.329694	pTa	LOW	papillary	0	no cis	7	0	31		31	53.4333	0			M	57				1	1	1	1
1117-1	DK	2	0.386692	2	0.326834	3	2.82619	1	-0.102314	pT2	HIGH	solid		CIS		0	7		7	52.4333	0			M	72			1
112_F	F	1	-0.0608377	2	0.20314	2	0.101991	1	-0.223106	pT2	HIGH	pap+solid		ND		0	4		4	4	0	cystectomy		M	49							1
112-10	DK	2	0.0091754	1	-0.0729006	1	1.76702	1	-0.329027	pTa	HIGH	papillary	1	CIS	5	0	88		88	88	0		BCG	F	72			1		1	1
113_F	F	2	0.0247899	2	0.0953587	1	0.347882	1	-0.253178	pTa	HIGH	pap	1	ND		2	10		10	10	1	cystectomy		M	71					1		1
1131-1	DK	1	-0.136129	1	-0.677096	2	0.455327	2	0.288034	pTa	PUNLMP	papillary	0	no cis	20	0	59		59	62.9333	0			M	63					1	1	1
1134-1	DK	2	0.0315535	1	-0.255306	2	0.715955	2	0.0776386	pT1b	HIGH	papillary	1	no cis		2	28	24.7333	24.7333	42.7667	1		BCG	M	81			1		1	1
1145-1	DK	2	0.135645	1	-0.244363	2	2.08832	2	0.125906	pTa	LOW	papillary	0	no cis	4	0	45		45	52.6667	2			M	79				1	1	1	1
1146-1	DK	1	-0.0385971	1	-0.92467	2	0.325388	1	-0.163929	pTa	HIGH	papillary	1	no cis	no rec	0	60		60	61.8667	0			M	53		1		1	1		1
1158-1	DK	1	-0.232312	1	-0.134147	2	0.612545	2	0.116552	pTa	PUNLMP	papillary	0	no cis	6	0	54		54	55.1667	0			M	72					1	1	1
11624_S	S	2	0.105782	2	0.231221	2	0.00706443	1	-0.226352	pT1b	HIGH	papillary	1	ND		0	31		31	41	2			M	77					1		1
1164-1	DK	2	0.355764	2	0.192933	3	0.796149	2	0.132706	pT2	HIGH	papillary + solid		no cis		0	42		42.6667	49.1	0			M	79			1
11678_S	S	1	-0.285979	1	-0.0678266	1	0.150362	2	0.0526689	pT1a	HIGH	papillary	1	ND		0	11		11	11	0	cystectomy		M	74					1		1
1182-1	DK	2	0.182315	2	0.420541	2	0.237085	2	0.0816142	pT1a	HIGH	papillary	1	CIS		0	64		64	68.3	0		BCG	M	45		1			1		1
1189-1	DK	1	-0.0223426	1	-0.161239	2	0.68827	2	0.0210659	pTa	LOW	papillary	0	no cis	7	0	50		50	52.5667	0		BCG	M	77					1	1	1
1191-1	DK	2	0.288083	2	0.286645	3	1.31385	2	0.361215	pT2	HIGH	solid		no cis		0	40		40	53.2333	0			M	76			1			1
1206-1	DK	2	0.329605	1	-0.274316	2	0.127	2	0.300338	pT1a	LOW	papillary	1	no cis		0	51		51	52.2333	0			M	62					1	1	1
1209-1	DK	2	0.090311	2	0.240695	1	0.190482	1	-0.260083	pT1a	HIGH	papillary	1	CIS		0	3		3	66	0	cystectomy		M	49					1	1	1
1210-1	DK	1	-0.179492	1	-0.155409	2	0.900798	1	-0.0117467	pTa	PUNLMP	papillary	0	no cis	24	0	43		43	51.9667	0			M	66					1	1	1
1211-1	DK	1	-0.165526	1	-0.699506	2	0.351057	2	0.0653784	pTa	LOW	papillary	0	no cis	14	0	50		50	51.9667	0			F	55					1	1	1
1211-2	F	2	0.0756054	2	0.338903	3	0.187082	2	0.0513657	pT3	HIGH	solid		ND		0	112.8		112.8	112.8	2	cystectomy		M	59							1
1224-1	DK	1	-0.398226	2	0.00621187	1	0.285825	2	0.0147948	pT1a	HIGH	papillary	1	CIS		2	25	11	11	26	1			F	73					1	1	1
12324_S	S	1	-0.118954	2	0.146409	1	0.276744	1	-0.0956746	pT1b	HIGH	papillary	1	ND		2	1	4	4	44	0	cystectomy		M	59					1		1
1238-1	DK	1	-0.014235	2	0.11325	1	0.138405	1	-0.207552	pTa	HIGH	papillary	1	no cis	6	0	63		63	63	0			M	70					1	1	1
1250-1	DK	1	-0.267763	1	-0.182849	2	0.213259	2	0.314061	pTa	PUNLMP	papillary	0	no cis	7	0	44		44	46.9	0			F	65					1	1	1
1252-1	DK	2	0.412081	2	0.168439	3	0.477836	2	0.279472	pT1b	HIGH	papillary	1	CIS		2	58	58	58	60	1		BCG	M	66					1	1	1
1255-1	DK	1	-0.202461	1	-0.0671109	2	0.030759	1	-0.173613	pTa	HIGH	papillary	1	no cis	37	0	49		49	49.8333	0			F	68				1	1	1	1
1257-1	DK	2	0.535162	2	0.254036	3	0.10398	2	0.29796	T1b	HIGH	solid	1	CIS		0	0		0	19.5333	1			M	70			1		1	1
1259-1	DK	1	-0.0682218	2	0.0994245	1	0.545795	1	-0.104031	pT1b	HIGH	papillary	1	no cis		2	58	6	6	64	0			M	72					1	1	1
1264-1	DK	1	-0.555074	1	-0.108863	1	3.05845	2	0.115512	pTa	HIGH	papillary	1	no cis	4	1	57		57	57.4667	0		BCG	F	66		1	1		1
1280-1	DK	2	0.0397262	1	-0.438	2	0.964282	2	0.0979856	pTa	HIGH	papillary	1	no cis	15	0	47		47	61.5333	0			M	62					1	1	1
1282-1	DK	1	-0.103723	2	0.324808	2	0.278149	1	-0.213398	pTa	LOW	papillary	0	no cis	4	0	46		46	61.3667	0			M	77					1	1	1
129_UK	UK	1	-0.449402	1	-0.140346	1	1.16137	1	-0.175561	pTa	HIGH	papillary	1	ND		0	58		58	58	0		BCG	M	66					1		1
1290-1	DK	2	0.106511	2	0.222197	2	1.04196	2	0.0202751	pTa	LOW	papillary	0	no cis	11	1	44		44	46.2	0			M	67					1	1	1
1293-1	DK	2	0.141781	1	-0.218589	2	0.190726	1	-0.117731	pT1	HIGH	papillary	1	no cis		0	45		45	60.6667	0			M	64					1	1	1
12944_S	S	2	0.172571	1	-0.0562894	2	0.207029	2	0.00124101	pTa	HIGH	papillary		ND		0	0		0	93	3			F	84							1
1303-1	DK	1	-0.483337	1	-0.942928	1	0.653105	2	0.264971	pTa	PUNLMP	papillary	0	no cis	46	0	40		40	46.1	0		BCG	F	66		1			1		1
13076_S	S	2	0.0376608	1	-0.151991	2	0.345633	1	-0.00825893	pT1b	HIGH	papillary		ND		0	0		0	61	2			M	72							1
132_UK	UK	2	0.13731	2	0.172259	1	0.397339	1	-0.171283	pT1	HIGH	papillary + solid	1	CIS		0	58		58	58	0		BCG	M	75					1	1	1
13207_S	S	1	-0.0998696	2	0.211472	2	0.00123106	1	-0.326594	pT1b	HIGH	papillary		ND		0	0		0	41	2			M	85							1
13240_S	S	2	0.132995	2	0.124629	2	0.109575	1	-0.202794	pT1b	HIGH	papillary		ND		0	0		0	1	3			M	88							1
1325_S	S	2	0.0460545	2	0.281309	1	0.2507	1	-0.131718	pT1b	HIGH	papillary	1	ND		0	62		62	62	0	cystectomy		M	57					1		1
1327-1	DK	1	-0.209673	1	-0.381464	2	0.185979	2	0.411243	pTa	HIGH	papillary	1	no cis	4	1	22		22	25.7667	2			F	67				1	1	1	1
1330-1	DK	2	0.238226	2	0.388493	3	0.322122	2	0.224585	pTa obs	HIGH	papillary	1	CIS	no rec	0	42		42	43.6667	0			M	64		1	1		1
1334-4	F	1	-0.350644	1	-0.265696	2	0.523188	1	-0.0331861	pTa	LOW	papillary	0	ND		0	77.2		77.2	77.2	0		BCG	M	60					1		1
1335-1	DK	1	-0.163345	2	0.221464	2	0.323014	2	0.448848	pTa	HIGH	papillary	1	CIS	35	0	42		42	43.1	0			M	48					1	1	1
1336-1	DK	1	-0.144526	1	-0.224912	2	0.0810188	2	0.291451	pT1a	HIGH	papillary	1	no cis		2	54	39.5333	39.5333	58.3333	0			M	77					1	1	1
1337-1	DK	1	-0.323534	2	0.0212143	1	0.270773	2	0.104116	pT1b	HIGH	papillary	1	CIS		0	49		49	50.2667	0		BCG	M	51		1			1		1
13419_S	S	2	0.0610478	2	0.193483	3	0.00388822	1	-0.320975	pT1b	HIGH	papillary	1	ND		0	1		1	9	1			F	66					1		1
1342-1	DK	2	0.242594	1	-0.46855	2	0.477675	2	0.25521	pTa	LOW	papillary	0	no cis	7	0	42		42	42.7667	0			M	61					1	1	1
1345-2	DK	2	0.447395	2	0.402306	2	0.360946	1	-0.472985	pTa	HIGH	papillary	1	CIS		2	23	23	23	28	1			M	74		1			1		1
1346-1	DK	1	-0.705422	1	-0.283053	1	0.0535366	2	0.0008622	pT1b	HIGH	papillary	1	no cis		0	41		41	41.3	0			M	61					1	1	1
13467_S	S	2	0.15024	2	0.256757	3	0.149655	1	-0.128418	pT1b	HIGH	papillary		ND		0	0		0	132	3			M								1
1349-1	DK	1	-0.274562	2	0.0137489	2	0.341666	1	-0.0894485	pTa	HIGH	papillary	1	no cis	5	0	30		30	42.3	0			M	54					1	1	1
1352-1	DK	1	-0.588536	1	-0.363894	2	0.301538	2	0.283031	pTa	HIGH	papillary	1	no cis	6	0	38		38	40.8333	0			F	43				1	1	1	1
1354-1	DK	1	-0.311966	1	-0.202192	2	0.495981	2	0.0138964	pTa	LOW	papillary	0	no cis	8	1	12		23	12.6	1			M	80		1			1		1
1366-1	DK	1	-0.632697	1	-0.23047	1	0.835627	2	0.398412	pTa	LOW	papillary	0	no cis	6	0	18		18	22.3333	2			M	68					1	1	1
1367-1	DK	2	0.373007	2	0.201727	2	0.415601	1	-0.00237863	pT1a	HIGH	papillary	1	no cis		0	37		37	39.4333	0			M	70					1	1	1
1375-1	DK	1	-0.0345114	2	0.309637	2	0.333029	2	0.474294	pT1a	HIGH	papillary	1	no cis		0	39		39	52.4667	0			M	53					1	1	1
13781_S	S	2	0.122973	2	0.267104	2	0.00616999	1	-0.34722	pT2	HIGH	papillary		ND		0	0		0	6	3			F	80							1
1379-1	DK	1	-0.0394644	1	-0.0457673	2	0.257189	2	0.485628	pT1a	HIGH	papillary	1	no cis		1	39		39	39.2333	0			F	67				1	1	1	1
13853_S	S	2	0.0746487	2	0.338017	1	0.229707	1	-0.244394	pT1b	HIGH	papillary	1	CIS		0	41		41	41	0	cystectomy		M	59					1	1	1
1390-1	DK	1	-0.0826378	1	-0.00981248	1	0.047715	2	0.223062	pT1a	HIGH	papillary	1	no cis		0	48		48	48.8	0			F	68					1	1	1
13964_S	S	2	0.0258858	2	0.0292441	2	0.696832	2	0.0109486	pTa	LOW	papillary	0	ND		2	15	15	15	17	1			M	49					1		1
140-16	DK	2	0.20112	1	-0.116773	2	0.56461	2	0.37455	pT1a	HIGH	papillary	1	no cis		0	16		16	20	2			F	75					1	1	1
1408-1	DK	1	-0.482004	1	-0.44811	1	1.10464	2	0.382024	pTa	HIGH	papillary	1	no cis	11	0	36		36	37.7667	0		BCG	M	33					1	1	1
1415-1	DK	1	-0.162019	2	0.103566	1	0.0376544	1	-0.084893	pTa	LOW	papillary	0	no cis	5	2	28		25	31	1		BCG	M	65					1	1	1
14226_S	S	2	0.0686624	2	0.216362	2	0.121747	1	-0.430111	pT1b	HIGH	papillary		ND		0	0		0	11	1			M	53							1
1425-1_DK	DK	2	0.160204	1	-0.0143416	2	0.324857	1	-0.089152	pT1b	HIGH	papillary	1	ND		2	1	1	1	45	0	cystectomy		M	70					1		1
1430-1	DK	1	-0.290989	2	0.263528	2	0.336304	2	0.136483	pT1b	HIGH	papillary	1	no cis		0	42		42	44.0333	0			F	80					1	1	1
1434-1	DK	1	-0.55129	1	-0.0488215	1	1.85966	2	0.149429	pT1a	HIGH	papillary	1	no cis		0	42		42	42.2333	0			M	70					1	1	1
14406_S	S	2	0.030436	2	0.276304	2	0.0330527	1	-0.378542	pT1	HIGH	papillary	1	ND		2	20	20	20	20	2			M						1		1
1443-1_DK	DK	2	0.215883	1	-0.00995742	2	0.1461	1	-0.29305	pT1b	HIGH	papillary	1	ND		2	10	10	10	53	0	cystectomy		M	69					1		1
1448-2	F	2	0.0376501	2	0.302547	3	0.00284198	2	0.102165	pT1b	HIGH	solid	1	ND		0	51.9667		51.9667	51.9667	2	cystectomy		M	71					1		1
1456-1	DK	1	-0.249226	2	0.126407	3	0.260806	1	-0.0318647	pT1b	HIGH	solid	1	no cis		2	19		19	31.5667	1			F	72					1	1	1
1473-1	DK	1	-0.489426	2	0.117971	1	0.656257	1	-0.310557	pT1b	HIGH	papillary	1	no cis		0	36		36	41.1	0			M	78					1	1	1
1478-1	DK	1	-0.351177	1	-0.12668	1	0.647165	2	0.164904	pTa	LOW	papillary	0	no cis	1	0	20		20	24.4667	0			M	74					1	1	1
1482-1	DK	1	-0.489739	1	-0.275592	1	0.417484	2	0.5456	pT1a	HIGH	papillary	1	no cis		0	37		37	41.2333	0		BCG	M	67		1			1		1
1507-1	DK	2	0.103308	1	-0.0474714	3	0.881518	2	0.299278	pTa	LOW	papillary	0	no cis	9	0	35		35	38.2	0		BCG	M	65					1	1	1
1512-6	F	2	0.29093	2	0.215603	3	0.804797	1	-0.118417	pT2	HIGH	solid		ND		0	6.96667		6.96667	6.96667	1	cystectomy		F	49							1
15152_S	S	2	0.120917	2	0.320796	2	0.0917526	1	-0.201255	pT1b	HIGH	papillary	1	ND		2	2	2	2	12	3			M	73					1		1
1533-10	F	1	-0.199812	2	0.112124	2	0.0685379	2	0.117119	pT1b	HIGH	papillary	1	ND		0	20.5667		20.5667	20.5667	1	cystectomy		M	34					1		1
154-5	DK	1	-0.0556431	1	-0.139165	2	0.399011	1	-0.637098	pTa	LOW	papillary	0	no cis	10	1	57		57	59	3			M	76					1	1	1
1571-1	DK	2	0.122779	2	0.100847	2	0.278699	2	0.148493	pT1b	HIGH	pap+cis	1	CIS		2	2	2.2	2.2	9.3	1			M	68					1	1	1
1574-1	DK	2	0.228703	2	0.129798	3	0.720252	2	0.13776	pT1b	HIGH	papillary	1	ND		0	4		4	4.73333	1			F	72					1		1
15901_S	S	1	-0.275297	1	-0.191274	2	0.0231341	1	-0.216307	pT1b	HIGH	papillary		ND		0	0		0	39	1			M	71							1
16162_S	S	2	0.0929717	2	0.272429	3	0.0826343	2	0.0859191	pT1b	HIGH	papillary	1	ND		2	1	1	1	8	3	cystectomy		M	75					1		1
16429_S	S	2	0.0503385	2	0.163547	1	0.321356	1	-0.442388	pT1b	HIGH	papillary		ND		0	0		0	18	2			M	85							1
16458_S	S	2	0.160862	2	0.338368	2	0.17337	1	-0.251375	pTa, pTIS	HIGH	pap+flat		CIS		0	0		0	62	2			M	80						1	1
16520_S	S	1	-0.445192	2	0.207496	1	0.26902	1	-0.38144	pT1	HIGH	papillary	1	ND		2	28	28	28	36	3	cystectomy		F	71					1		1
1656-1	DK	2	0.287141	2	0.340621	2	0.128728	1	-0.481691	pTa	HIGH	papillary	1	no cis	4	1	12		12	14.5333	0			F	80					1	1	1
1660-1	DK	2	0.111364	2	0.343728	3	0.310706	1	-0.0475143	pT1b	HIGH	papillary+solid	1	ND		2	2	2	2	8	0			M	80					1		1
16667_S	S	1	-0.24297	2	0.0308307	1	0.42355	1	-0.393137	pTa	HIGH	papillary	1	ND		0	2		2	2	1			M	84					1		1
167_UK	UK	2	0.0528731	2	0.151294	2	0.279198	1	-0.123529	pT1a	HIGH	papillary	1	CIS		0	34		34	51	3		BCG	F	88					1	1	1
16766_S	S	1	-0.159127	2	0.184748	1	0.0435652	1	-0.062408	pT1b	HIGH	papillary + solid	1	ND		0	6		6	10	2			M	70					1		1
168_UK	UK	1	-0.294725	2	0.112675	2	0.75882	1	-0.22712	pTa	HIGH	papillary	1	ND		0	28		28	30	2		MMC	M	73					1		1
16805_S	S	2	0.0457781	1	-0.0212971	2	0.067172	1	-0.0966017	pT1b	HIGH	papillary	1	ND		2	14	14	14	15	1			M	82					1		1
169_F	F	1	-0.0647866	2	0.0475998	1	0.318064	1	-0.280568	pT1a	HIGH	pap	1	ND		0	47		47	47	0		BCG	M	60					1		1
17089_S	S	2	0.270287	1	-0.105351	2	0.26441	1	-0.28289	pTa	HIGH	papillary	1	ND		0	6		6	8	2			M						1		1
171_F	F	1	-0.31793	2	0.0710615	1	0.192522	1	-0.106027	pT1b	HIGH	pap	1	ND		0	51		51	51	0		BCG	M	77					1		1
17266_S	S	1	-0.405003	1	-0.21875	2	0.00926647	2	0.348674	pT1a	HIGH	papillary		ND		0	0		0	0	0	cystectomy		M	46							1
17601_S	S	1	-0.109407	2	0.114674	1	0.056825	1	-0.585319	pT1a	HIGH	papillary	1	ND		2	40	40	40	44	1			M	70					1		1
17640_S	S	2	0.384997	2	0.306442	2	0.368939	2	0.0383615	pT2	HIGH	papillary + solid		ND		0	0		0	22	3			M								1
177-1	DK	2	0.0680239	1	-0.329784	2	0.327011	1	-0.256168	pT1a	HIGH	papillary	1	no cis		0	67		67	132.8	0		BCG	M	66					1	1	1
17753_S	S	2	0.380492	2	0.278581	2	0.700944	2	0.0889159	pT1b	HIGH	papillary	1	ND		2	48	48	48	73	1	cystectomy		M						1		1
17754_S	S	2	0.106205	2	0.0166673	2	0.178562	1	-0.371458	pT1b	HIGH	papillary	1	ND		0	148		148	148	0			M	43					1		1
17798_S	S	2	0.0917519	2	0.298151	3	0.0296715	1	-0.0102127	pT1b	HIGH	solid	1	no cis		2	9	9	9	43	3			M	74					1	1	1
17932_S	S	1	-0.00695614	2	0.104936	2	0.100922	1	-0.326431	pT1a	HIGH	papillary		ND		0	0		0	3	3			M	75							1
18318_S	S	2	0.0240358	2	0.251989	3	0.290358	2	0.125156	pT2 obs	HIGH	solid		ND		0	51		51	51	0	cystectomy		M	80							1
18404_S	S	2	0.126348	2	0.325589	2	0.418233	1	-0.192291	pT1a	HIGH	papillary	1	ND		0	39		39	39	0			M	78					1		1
18410_S	S	2	0.136132	2	0.151888	1	0.0463882	1	-0.301526	pT1a	HIGH	papillary	1	ND		0	101		101	101	0			M	70					1		1
18600_S	S	1	-0.339907	1	-0.434206	1	0.290958	2	0.145473	pT1a	HIGH	papillary	1	ND		0	31		31	42	3			M	81					1		1
187_UK	UK	1	-0.399952	1	-0.103198	1	1.31626	1	-0.119856	pT1b	LOW	papillary	1	ND		0	10		10	54	0	cystectomy	BCG - MMC	F	59					1		1
18757_S	S	1	-0.589563	1	-0.135401	1	0.660576	1	-0.133783	pT1a	HIGH	papillary	1	CIS		0	36		36	36	0			M	61					1	1	1
18775_S	S	2	0.0758166	2	0.19616	1	0.00959055	1	-0.285833	pT1*	HIGH*	papillary*	1	ND		2	17	17	17	17	2			F	85					1		1
1887-1	DK	2	0.056753	2	0.188769	3	0.123444	1	-0.164021	pT1	HIGH	solid	1	no cis		2	2	1	1	11	0	cystectomy		F	67					1	1	1
18877_S	S	2	0.221155	2	0.286143	1	0.12399	1	-0.392135	pTa	HIGH	papillary	1	ND		0	11		11	15	0			M	77					1		1
18970_S	S	1	-0.0483266	2	0.0983581	2	0.0368816	1	-0.297785	pTa	HIGH	papillary		ND		0	0		0	160	0			M	53							1
19134_S	S	1	-0.0912856	2	0.287826	1	0.608284	1	-0.167458	pT1b	HIGH	papillary	1	ND		0	3		3	150	0	cystectomy		M	63					1		1
19292_S	S	1	-0.124586	1	-0.351856	2	0.0191341	1	-0.178655	pTa	LOW	papillary	0	ND		0	7		7	29	0	cystectomy		M	59					1		1
193_F	F	1	-0.0747876	2	0.145709	1	0.238468	1	-0.157349	pT2	HIGH	solid		ND		0	71		71	71	0		BCG	M	65							1
194_F	F	1	-0.485135	2	0.136923	1	0.498331	1	-0.27595	pT1a	HIGH	pap	1	ND		0	19		19	19	0			M	73					1		1
1950_S	S	1	-0.182329	2	0.225615	1	0.0256268	2	0.0194191	pT2	HIGH	papillary + solid		ND		0	1		1	69	3	cystectomy		M	54							1
19700_S	S	2	0.0585204	2	0.229897	2	0.131158	1	-0.455592	pT1a	HIGH	papillary		no cis		0	0		0	49	1			M	68						1	1
19783_S	S	2	0.0556407	2	0.375853	2	0.143453	1	-0.491328	pT1b	HIGH	papillary	1	ND		0	87		87	87	0			M	50					1		1
1983_S	S	1	-0.0545724	2	0.160258	2	0.105586	2	0.0607507	pT1b	HIGH	papillary		ND		0	0		0	8	1			M	53							1
19992_S	S	1	-0.100437	2	0.157258	2	0.138128	2	0.0980235	pT1	HIGH	papillary	1	ND		0	104		104	111	2			M	76					1		1
20421_S (91?)	S	1	-0.120825	2	0.154961	2	0.445974	1	-0.00633028	pT1b	HIGH	papillary		ND		0	0		0	26	3			M	76							1
20577_S	S	2	0.0851902	2	0.177116	2	0.144227	2	0.05657	pT1b	HIGH	papillary	1	ND		2	27	27	27	52	1	cystectomy		M						1		1
20724_S	S	2	0.276132	1	-0.135022	2	0.761647	2	0.135138	pTa	HIGH	papillary		ND		0	0		0	5	3	cystectomy		F	73							1
20750_S	S	1	-0.301492	1	-0.011316	1	0.162197	2	0.0871205	pT1	HIGH	papillary	1	ND		0	42		42	107	3			F	72					1		1
20803_S	S	1	-0.034844	1	-0.00167553	2	0.220205	2	0.116282	pT1a	HIGH	papillary	1	ND		0	85		85	85	0			F	78					1		1
20975_S	S	1	-0.0164494	2	0.175458	2	0.0532415	2	0.0280902	pT1	HIGH	papillary	1	ND		0	95		95	95	0			F	71					1		1
21040_S	S	1	-0.145082	1	-0.136755	2	0.0769394	2	0.0113728	pT1b	HIGH	papillary	1	ND		0	16		16	16	2			M	82					1		1
21077_S	S	2	0.394133	1	-0.124962	2	0.309617	2	0.200745	pT1	HIGH	papillary	1	ND		0	137		137	137	0			M	63					1		1
21512_S	S	2	0.0387166	2	0.055031	2	0.409045	1	-0.147237	pT1a	HIGH	papillary	1	no cis		2	64	64	64	64	1			M	83					1	1	1
2160_S	S	1	-0.170181	1	-0.0917523	2	0.0768037	1	-0.412343	pT1a	HIGH	papillary		ND		0	0		0	50	3			M	66							1
217-11	DK	1	-0.142014	1	-0.388346	2	0.528266	2	0.449106	pTa	HIGH	papillary	1	no cis	61	2	61	61	61	71	0			M	51					1	1	1
225_UK	UK	2	0.0574	2	0.199328	2	0.0313473	1	-0.213512	pT1a	HIGH	papillary	1	CIS		0	44		44	44	0		BCG - MMC	M	65					1	1	1
22562_S	S	2	0.315715	2	0.238403	2	0.136444	2	0.0511315	pT1a	HIGH	papillary		ND		0	0		0	12	1			M	65							1
240-12	DK	1	-0.298613	1	-0.127169	2	0.306175	2	0.277138	pTa	HIGH	papillary	1	CIS	4	0	48		48	49	0			M	72					1	1	1
242-3	DK	2	0.0474618	1	-0.116341	2	0.388398	2	0.137188	pT1	HIGH	papillary	1	CIS		2	12	12	12	15	1		BCG	M	74					1	1	1
24745_S	S	2	0.212937	2	0.323706	2	0.0451132	1	-0.215565	pT2	HIGH	papillary		ND		0	0		0	0	0			M	88							1
2477_S	S	1	-0.0153046	2	0.20498	1	0.118229	1	-0.255953	pTa	LOW	papillary		ND		0	0		0	40	2			M	77							1
247-9	DK	2	0.309694	1	-0.0961654	3	0.272037	2	0.382467	pTa	HIGH	papillary	1	CIS	3	2	15	15	15	18	1			M	81					1	1	1
248_UK	UK	1	-0.553703	1	-0.0584496	1	0.440273	1	-0.154317	pTa	HIGH	papillary	1	ND		0	50		50	50	0		MMC	F	68					1		1
263-1	F	1	-0.124742	1	-0.00830704	2	0.0651428	2	0.00655183	pT1a	HIGH	papillary	1	ND		0	140.1		140.1	140.1	0		BCG	M	58					1		1
266_UK	UK	1	-0.0780418	2	0.30167	2	0.190987	1	-0.0490394	pTa	HIGH	papillary	1	CIS		0	42		42	42	0		BCG - MMC	M	67					1	1	1
27386_S	S	1	-0.0773555	1	-0.0229282	2	0.450373	1	-0.0500993	pTa	HIGH	papillary		ND		0	0		0	108	2			F								1
276_UK	UK	1	-0.0702951	2	0.159511	2	0.0206832	1	-0.22342	pTa	PUNLMP	papillary	0	no cis		0	42		42	42	0		MMC	M	55					1	1	1
277_UK	UK	1	-0.152089	2	0.102306	2	0.067197	1	-0.35626	pTa	LOW	papillary	0	ND		0	50		50	50	0		BCG	M	73					1		1
2814_S	S	2	0.0648747	2	0.128761	2	0.344132	1	-0.20439	pT1b	HIGH	papillary		ND		0	0		0	0	0	cystectomy		M								1
288-2	F	2	0.0507139	2	0.178842	3	0.217049	2	0.226988	pT2*	HIGH*	?		ND		0	243.333		243.333	243.333	1			M	59							1
289-3	F	1	-0.227513	2	0.187827	2	0.0370159	2	0.128729	pT2*	HIGH*	?		ND		0	1.93333		1.93333	1.93333	0			M	71							1
290_UK	UK	1	-0.00252609	2	0.0276657	2	0.165517	1	-0.476844	pT1a	LOW	papillary	1	ND		0	44		44	44	0		MMC	F	63					1		1
2926_S	S	1	-0.0306745	2	0.142727	1	0.0130143	1	-0.309744	pT1a	HIGH	papillary		ND		0	0		0	39	2			F	91							1
295_UK	UK	1	-0.0507386	1	-0.160074	2	0.177207	1	-0.136158	pTa	PUNLMP	papillary	0	ND		0	24		24	24	0		BCG - MMC	M	87					1		1
29600_S	S	1	-0.081742	1	-0.0717477	2	0.175667	1	-0.034334	pTa	LOW	papillary	0	ND		2	29	29	29	42	2			M	61					1		1
304_UK	UK	1	-0.0782751	1	-0.00775591	2	0.107652	1	-0.634656	pTa	PUNLMP	papillary	0	no cis		0	14		14	33	3			M	85					1	1	1
311_UK	UK	1	-0.0110159	1	-0.0649859	2	0.210634	1	-0.127907	pTa	PUNLMP	papillary	0	ND		0	49		49	49	0			M	73					1		1
31373_S	S	1	-0.327436	1	-0.101322	2	0.549967	1	-0.163778	pTa	LOW	papillary	0	ND		0	144		144	144	0			F	70					1		1
31999_S	S	1	-0.117165	1	-0.0761114	1	0.0189064	1	-0.238223	pTa	HIGH	papillary		no cis		0	0		0	101	3			M	78						1	1
320-7	DK	2	0.0484228	2	0.178143	2	0.0807048	1	-0.0197999	pTa	HIGH	papillary	1	CIS	3	2	8	8	8	10	1			M	69					1	1	1
332-1	DK	1	-0.0826359	1	-0.0223378	2	2.52062	1	-0.00551658	pT1a	HIGH	papillary	1	no cis		0	66		66	116.433	0			M	69					1	1	1
334_UK	UK	1	-0.000407148	2	0.193898	2	0.0876644	1	-0.474363	pT1b	HIGH	papillary	1	ND		0	14		14	16	3		BCG	F	93					1		1
335-6	DK	1	-1.08255	1	-0.321358	2	0.0175936	2	0.402451	pTa	LOW	papillary	0	no cis	6	0	28		28	34	0			F	77					1	1	1
341_UK	UK	2	0.0944137	2	0.127621	2	0.15141	1	-0.33949	pTa	LOW	papillary	0	ND		0	30		30	30	0		BCG	F	80					1		1
347-5	DK	1	-0.239647	2	0.0762415	1	0.091782	1	-0.033366	pT1a	HIGH	papillary	1	no cis		2	18	18	18	24	1			M	75					1	1	1
3595_S	S	1	-0.0883069	2	0.275204	1	0.426135	1	-0.400911	pT1b	HIGH	papillary		ND		0	0		0	13	3			F	77							1
361_UK	UK	1	-0.0296834	2	0.0758686	2	0.153192	1	-0.309309	pTa	PUNLMP	papillary	0	ND		0	9		9	33	3			F	89					1		1
368-4	DK	1	-0.880035	1	-0.280335	2	0.616462	2	0.602386	pTis	LOW	flat		no cis	5	0	16		16	20	3			M	76	1					1	1
37_UK	UK	1	-0.0108058	1	-0.170664	2	0.325933	2	0.020979	pT1a	HIGH	papillary		ND		0	0		0	22	0	cystectomy		F	76							1
407-1	DK	1	-0.481286	2	0.198102	2	0.0298254	1	-0.427599	pTa	LOW	papillary	0	no cis	72	0	110		110	112.867	0			F	62					1	1	1
4134_S	S	2	0.0340304	2	0.313242	1	0.267713	1	-0.0760703	pT1a	HIGH	papillary	1	ND		0	3		3	3	0	cystectomy		M	67					1		1
4405_S	S	2	0.257017	2	0.0490972	2	0.441687	2	0.0656061	pTa	HIGH	papillary	1	ND		2	53	53	53	79	1	cystectomy		M	73					1		1
441-1	DK	2	0.329372	1	-0.0447193	2	1.11011	2	0.287766	pTIS	LOW	flat		CIS		1	98		98	111.267	0			M	69				1		1	1
4482_S	S	1	-0.0812452	1	-0.366278	2	0.195878	1	-0.0203068	pT1	HIGH	papillary	1	ND		2	6	6	6	6	1			M	83					1		1
4489_S	S	1	-0.60211	2	0.0929988	1	0.459495	1	-0.421867	pTa	LOW	papillary	0	ND		0	54		54	54	0			F	79					1		1
4753_S	S	2	0.115357	2	0.139982	2	0.00637336	1	-0.120267	pT1b	HIGH	papillary	1	ND		0	83		83	83	0			M	72					1		1
4763_S	S	2	0.0760406	2	0.262712	3	0.452385	1	-0.1469	pT2	HIGH	solid		ND		0	0		0	14	1			M	77							1
4776_S	S	1	-0.201175	1	-0.00318502	1	0.157074	1	-0.20324	pTa	HIGH	papillary		ND		0	0		0	31	2			M	78							1
478-2	F	1	-0.408563	1	-0.186062	1	0.0478516	2	0.140374	pTa	LOW	papillary	0	ND		0	185.267		185.267	185.267	0	cystectomy		M	64					1		1
4838_S	S	2	0.0161545	2	0.0626262	3	0.375038	1	-0.156664	pT2 obs	-	Squamous cell carcinoma		ND		0	2		2	4	3	cystectomy		M	61							1
490_UK	UK	2	0.0830519	2	0.112162	2	0.0887224	1	-0.110296	pTa	HIGH	papillary	1	CIS		1	37		37	37	0		BCG	M	71					1	1	1
4935_S	S	1	-0.269182	2	0.13398	1	0.0166198	2	0.0219083	pTa	LOW	papillary	0	ND		0	50		50	50	0			M	78					1		1
5099_S	S	1	-0.0717788	2	0.0241048	2	0.136882	1	-0.218259	pT2	HIGH	papillary + solid		ND		0	0		0	0	0			M	86							1
519_UK	UK	2	0.0948013	2	0.0237356	2	0.0664453	1	-0.22962	pT1b	HIGH	papillary	1	CIS		2	9	6	6	34	0	cystectomy	MMC	M						1	1	1
521-1	DK	1	-0.596954	1	-0.0839961	1	0.232727	1	-0.197026	pTa	HIGH	papillary	1	no cis	12	0	46		46	105.167	0			M	27					1	1	1
525_UK	UK	2	0.163707	2	0.0927664	2	0.289939	1	-0.147841	pTa	LOW	papillary	0	ND		2	27	2	2	27	0			M	84					1		1
532-8	DK	1	-0.542139	1	-0.564266	1	0.233035	2	0.199539	pTa*	LOW*	papillary*	0	no cis	18	0	107		107	118	0			M	44					1	1	1
539-1	DK	1	-0.204514	1	-0.0395163	1	0.0330535	1	-0.00221274	pTa*	LOW*	papillary*	0	no cis	14	0	98		98	103.8	0			F	44					1	1	1
5731_S	S	2	0.0467352	2	0.290626	2	0.014606	1	-0.558656	pT1	HIGH	papillary	1	ND		0	11		11	22	2			M	71					1		1
576-6	DK	1	-1.688	2	0.0132043	2	0.136914	1	-0.024849	pTa*	LOW*	papillary*		no cis	6	0	65		67	0	0			M	77	1					1	1
58-11	DK	1	-0.47636	1	-0.419568	2	0.282488	2	0.188317	pTa	LOW	papillary	0	no cis	8	0	56		56	57	0			M	76					1	1	1
5880_S	S	2	0.0103263	2	0.105792	2	0.621423	2	0.0781469	pTa	HIGH	papillary		ND		0	0		0	42	2			M	86							1
5911_S	S	2	0.132621	2	0.281121	2	0.0580861	1	-0.296643	pTa	HIGH	papillary	1	ND		2	23	23	23	26	3	cystectomy		M	70					1		1
6150_S	S	2	0.132036	2	0.167495	3	0.066924	1	-0.211941	pT1b	HIGH	papillary		ND		2	0	0	0	5	3	cystectomy		F	50							1
62-9	DK	1	-0.241111	2	0.0348336	2	0.0606314	1	-0.221788	pTa	HIGH	papillary	1	CIS	9	0	44		44	52	3		BCG	M	70					1	1	1
635_S	S	2	0.0772378	2	0.222414	3	0.0775936	1	-0.237459	pT2	HIGH	solid		no cis		0	0		0	4	3			M	85							1
647-1	DK	1	-0.434584	1	-0.46596	2	1.48475	2	0.323423	pTa*	LOW*	papillary*	0	no cis	36	0	46		46	60.6333	3			M	60					1	1	1
6679_S	S	2	0.0792044	2	0.18603	1	0.0221153	2	0.143755	pT1b	HIGH	papillary		ND		0	0		0	38	3			M	94							1
677-1	F	1	-0.715774	1	-0.197287	1	1.02237	2	0.0156619	pTa	HIGH	papillary	1	ND		1	111.1		111	111.1	0		BCG	M	58					1		1
679-2	DK	2	0.592514	2	0.103446	2	0.0512065	2	0.320517	pTa*	LOW*	papillary*		CIS	5	2	41	32	32	46	1			M	76	1			1		1	1
682-2	DK	1	-0.724373	1	-0.0657687	2	0.105648	1	-0.395222	pTa	PUNLMP	papillary	0	ND	9	0	64		64	80	0			M	77					1		1
684-4	DK	2	0.340226	2	0.440324	2	0.446834	2	0.116169	pT1a	HIGH	papillary	1	CIS		0	73		73	81	0		BCG	M	77					1	1	1
6876_S	S	1	-0.52512	1	-0.000484707	1	0.180843	1	-0.0581264	pT1	HIGH	papillary		ND		0	0		0	92	2			M	72							1
692-1	F	1	-0.0781399	2	0.200508	2	0.100569	2	0.501102	pT2*	HIGH*	?		ND	5	0	8		8	89.4333	1			M	70				1			1
692-1	DK	2	0.183774	1	-0.532614	2	0.801303	2	0.37836	pTa	LOW	papillary	0	no cis		0	41		41	8	0			M	84		1			1		1
6971_S	S	2	0.156776	2	0.120692	1	0.0209223	1	-0.361068	pT1b	HIGH	papillary	1	CIS		2	10	10	10	10	1			F	81					1	1	1
698_S	S	1	-0.244615	2	0.0868963	1	0.237795	2	0.179646	pT1a	HIGH	papillary	1	ND		0	118		118	118	0			M	72					1		1
698-2	DK	2	0.356036	2	0.275831	3	0.0715149	2	0.0598249	pT1	HIGH	papillary	1	CIS		0	2		2	101	0	cystectomy		M	77					1	1	1
703-1	DK	2	0.167724	1	-0.308359	2	1.57379	2	0.516701	pTa	LOW	papillary	0	no cis	6	0	63		63	95.6667	0			M	79					1	1	1
7184_S	S	1	-0.435822	2	0.0442554	1	0.397965	1	-0.0749079	pTa	LOW	papillary	0	ND		0	40		40	40	0			M	42					1		1
7188_S	S	1	-0.204657	2	0.390222	1	1.13544	1	-0.430825	pTa obs	HIGH	papillary	1	ND		0	59		59	59	0			F	81					1		1
735_UK	UK	2	0.0193931	1	-0.00295619	2	0.0458799	1	-0.111725	pTa	LOW	papillary	0	ND		0	26		26	26	0		BCG	F	77					1		1
735-1_DK	DK	1	-0.279912	2	0.183966	1	0.497293	1	-0.380859	pT1b	HIGH	papillary	1	no cis		0	95		95	95	0			M	69					1	1	1
74_UK	UK	1	-0.451881	1	-0.0678066	1	0.961904	1	-0.083462	pTa	PUNLMP	papillary	0	no cis		0	64		64	64	0			M	52					1	1	1
745-1	F	1	-0.119275	1	-0.0436221	2	0.0427565	2	0.0665868	pTa	HIGH	papillary	1	ND		0	105.333		105.333	105.333	2			M	65					1		1
746-1	DK	1	-0.00716724	1	-0.587483	2	1.05209	2	0.235392	pTa	LOW	papillary	0	no cis	11	0	86		86	93.1333	0			M	76					1	1	1
747-7	DK	1	-0.300936	2	0.062419	1	3.99332	1	-0.0176501	pT1a	HIGH	papillary		no cis		0	23		23	23	3		BCG	M	49	1		1			1
7546_S	S	1	-0.455637	2	0.00194675	1	0.86325	1	-0.436999	pT1a	HIGH	papillary	1	ND		0	56		56	56	0			M	70					1		1
760-1	DK	2	0.388159	2	0.0722085	3	0.993666	2	0.290495	pT1	HIGH	papillary	1	CIS		0	90		90	100.8	0		BCG	M	72					1	1	1
763-1	DK	2	0.258	2	0.125239	2	0.565024	2	0.0297739	pTa	LOW	papillary	1	CIS	17	0	83		83	85.4	0			M	59		1			1		1
7739_S	S	1	-0.0815846	2	0.231146	1	0.433985	1	-0.214474	pT1a	HIGH	pap+flat	1	CIS		0	64		64	64	0			M	88					1	1	1
775-1	DK	2	0.266648	1	-0.464048	2	0.289603	2	0.374157	pT1a	HIGH	papillary	1	no cis		0	41		41	48.1333	2			M	70		1			1		1
793-1	DK	1	-0.589744	1	-0.278635	2	0.118269	1	-0.137164	pTa*	LOW*	papillary*	0	no cis	13	0	81		81	83.0667	0			M	67					1	1	1
794-3	DK	1	-0.404091	1	-0.189112	1	0.652346	1	-0.0329973	pTa	LOW	papillary	0	no cis	14	0	88		88	89	0			M	70					1	1	1
795-13	DK	2	0.527648	1	-0.172492	2	0.422656	2	0.339516	pTa	HIGH	papillary	1	no cis	5	0	19		19	43	2			M	67					1	1	1
797-1	DK	1	-0.414642	1	-0.560436	2	0.830291	1	-0.034524	pTa	HIGH	papillary	1	CIS	48	0	78		78	82.6667	0			M	79					1	1	1
7988_S	S	2	0.11973	2	0.152757	1	0.0864164	1	-0.0562759	pTa	LOW	papillary	0	ND		0	42		42	42	0			F	58					1		1
8054_S	S	2	0.344506	1	-0.263577	2	0.834363	1	-0.140976	pTa	HIGH	papillary	1	ND		0	160		160	160	0			M	64					1		1
812-1	DK	1	-0.756756	1	-0.0726473	2	0.329318	1	-0.357969	pTa	HIGH	papillary	1	no cis	6	0	78		78	81.0333	0			M	48			1		1	1
815-1	DK	1	-0.446349	1	-0.319595	2	1.3616	2	0.405121	pTa	HIGH	pipillary		no cis	20	0	49		49	62.1	2			M	73	1			1		1	1
823-2	DK	1	-0.0784324	2	0.0632704	2	0.168886	2	0.0289376	pTa	PUNLMP	papillary	0	no cis	5	0	61		61	65	2			M	56					1	1	1
824-1	F	1	-0.388549	1	-0.450355	2	0.774214	2	0.0312446	pTa	HIGH	papillary	1	ND		0	99.3333		99.3333	99.3333	0			M	58					1		1
825-3	DK	1	-0.604899	1	-0.00243108	1	0.300243	2	0.15439	pTa	HIGH	papillary		CIS	2	1	18		18	22	2			M	73	1					1	1
829-1	DK	2	0.104826	1	-0.0287099	2	0.175219	2	0.389056	pTa	LOW	papillary	0	no cis	5	0	76		76	79.8333	0			F	63				1	1	1	1
837-1	DK	2	0.224735	2	0.127366	3	0.238213	2	0.0962797	pTa	LOW	papillary	0	no cis	2	2	12	12	12	16.1667	2		MMC	M	68					1	1	1
839-1	DK	2	0.502317	2	0.308328	2	1.18413	2	0.0670877	pT1b	HIGH	papillary + flat		CIS		2	17	12.7333	12.7333	24.7	1			M	84	1					1	1
840-1	F	1	-0.544623	1	-0.23705	1	0.300027	2	0.229742	pTa	LOW	papillary	0	ND		0	69.9		69.9	69.9	0		BCG	M	70					1		1
841-1	DK	1	-0.423361	1	-0.101832	1	0.131997	1	-0.118276	pTa*	LOW*	papillary*	0	ND	no rec	0	57		57	78.7	0			M	31					1		1
843-1	DK	1	-0.0772019	1	-0.021236	2	0.340709	2	0.149541	pTa	LOW	papillary	1	CIS	3	2	20	17.7	17.7	24.6333	1			M	70					1	1	1
845-1	DK	1	-0.335887	1	-0.128754	1	0.119158	2	0.212634	pT1	HIGH	papillary	1	no cis		0	62		62	62	0			F	78					1	1	1
855-1	DK	1	-0.210551	1	-0.115406	2	0.0840271	1	-0.103613	pT1a	HIGH	papillary	1	no cis		0	56		56	56	0			M	64					1	1	1
856-2	DK	2	0.0878459	2	0.21062	2	0.211466	1	-0.0933764	pT1a	HIGH	papillary	1	CIS		2	47	1	1	47	1		BCG	M	75					1	1	1
861-1	DK	1	-1.74994	1	-0.214538	1	0.180053	1	-0.39671	pTa*	LOW*	papillary*		no cis	4	0	76		76	78.0333	0		BCG	M	73	1			1		1	1
865-1	DK	2	0.573574	1	-0.596935	2	0.449152	2	0.279121	pTa	LOW	papillary		no cis	6	1	69		69	72.0667	2			M	70	1					1	1
867_UK	UK	2	0.0689028	2	0.138266	1	0.042707	1	-0.0306568	pTa	LOW	papillary	0	no cis		1	16		16	16	0		BCG	M	79					1	1	1
876-1	DK	1	-0.434842	2	0.0132092	1	1.27457	1	-0.402202	pTa	HIGH	papillary	1	no cis	7	0	85		85	86.7667	0		BCG	M	57			1		1	1
880-1	DK	1	-1.31245	1	-0.11769	2	1.09169	2	0.314667	pT1a	HIGH	papillary		no cis		0	87		87	90.5667	0			M	58	1		1			1
881-1	DK	2	0.223012	2	0.132632	2	0.239141	2	0.0492937	pT1a	HIGH	papillary	1	no cis		0	83		83	83	0			M	70					1	1	1
886-1	DK	1	-0.0142873	2	0.289694	1	0.176018	1	-0.196155	pT1b	HIGH	papillary + solid	1	no cis		2	5	5	5	10	1			M	76					1	1	1
8908_S	S	2	0.122703	2	0.366964	1	0.168874	1	-0.0555767	pT1a	HIGH	papillary	1	ND		0	44		44	44	0			M	68					1		1
898-1	DK	1	-1.87814	1	-0.185133	2	0.263742	2	0.231007	pTa	LOW	papillary		no cis	11	0	73		73	75.1333	0			M	78	1					1	1
9148_S	S	2	0.0919087	1	-0.0768664	2	0.477947	1	-0.191643	pTa	HIGH	papillary	1	ND		0	22		22	28	2			M	64					1		1
9155_S	S	2	0.273484	2	0.359829	2	0.222181	2	0.0623634	pT1b	HIGH	papillary	1	ND		2	12	6	6	12	3			M						1		1
916-1	DK	1	-0.905967	1	-0.1839	1	0.47273	2	0.0684357	pTa	PUNLMP	papillary	0	no cis	4	0	68		68	72.6	0			F	51					1	1	1
924-1	F	1	-0.139997	2	0.130955	2	0.120849	2	0.123993	pT3	HIGH	solid		ND		0	13.2667		13.2667	13.2667	1	cystectomy		M	63							1
925-7	DK	2	0.0926548	1	-0.266249	2	0.426617	2	0.249412	pT1a	HIGH	papillary	1	no cis		1	37		37	40	0			M	65				1	1	1	1
926-1	DK	1	-0.627106	1	-0.618177	2	0.148927	2	0.0730053	pTa	LOW	papillary	0	no cis	15	0	67		67	72.3667	0			M	55					1	1	1
927-1	DK	1	-0.190516	1	-0.0463954	2	0.0297801	2	0.173666	pT1a	HIGH	papillary	1	no cis		0	87		87	87.7333	0			M	71					1	1	1
9286_S	S	2	0.125645	2	0.343892	1	0.149908	1	-0.558835	pT1b	HIGH	papillary		CIS		0	0		0	59	0	cystectomy		F	65						1	1
930-1	DK	1	-0.64671	1	-0.158589	2	0.628884	1	-0.776564	pTa	LOW OBS	papillary	0	no cis	no rec	0	26		26	84.7	0			F	62			1	1	1	1
938-1	DK	2	0.0682224	2	0.176947	1	0.0603565	1	-0.146985	pT1	HIGH	papillary	1	ND		2	0	7	7	7	1			M	83					1		1
941-4	DK	2	0.427113	1	-0.377035	2	1.11534	1	-0.472892	pTa	HIGH	papillary		no cis	11	2	11	11	11	65	0			F	68	1					1	1
942-1	DK	1	-0.235944	1	-0.216536	2	0.228672	1	-0.339804	pTa	LOW	papillary	0	no cis	24	0	74		74	77.9667	0			M	58				1	1	1	1
944-1	DK	2	0.119433	1	-0.651223	3	0.132732	2	0.376726	pTa	LOW	papillary	0	no cis	no rec	0	60		60	85.6667	0			M	71					1	1	1
962-1	DK	2	0.138699	2	0.294719	3	0.282128	2	0.0478799	pTa	PUNLMP	papillary	0	no cis	19	2	45	36.5333	36.5333	46.9667	1			M	65					1	1	1
967-3	DK	2	0.24365	2	0.264574	2	0.416895	1	-0.142907	pT1b	HIGH	papillary	1	CIS		0	4		4	54	0	cystectomy		F	67					1	1	1
970-1	DK	2	0.392729	1	-0.0490529	3	0.132313	2	0.269184	pT2	HIGH	papillary		ND		0	2		2	3.83333	1			F	76							1
972-1	DK	2	0.104125	1	-0.758081	2	1.28777	2	0.377558	pTa	LOW	papillary	0	ND	6	0	44		44	69	0			M	82					1		1
99_UK	UK	1	-0.27228	1	-0.245188	1	0.658741	1	-0.171167	pTa	LOW	papillary	0	no cis		0	61		61	61	0			M	54					1	1	1
992-1	DK	1	-0.163051	2	0.241784	1	0.147281	1	-0.243826	pTa*	LOW*	papillary*	0	no cis	18	2	20	18	18	21	1			M	67					1	1	1
9923_S	S	2	0.0734302	2	0.333475	2	0.206194	1	-0.183821	pT1	HIGH	papillary		ND		0	0		0	132	2			M								1
997-1	DK	1	-0.441532	1	-0.444991	2	2.08558	2	0.162963	pTa	PUNLMP	papillary		no cis	21	0	53		53	68.5667	0			M	52	1					1	1
998-1	DK	2	0.200777	2	0.147387	3	0.0591858	1	-0.363926	pT1b	HIGH	papillary	1	no cis		0	57		57	81	0			M	53					1	1	1
Esp101_E	E	2	0.396987	2	0.155193	2	0.193576	1	-0.0216421	pT1	HIGH	papillary	1	ND		0	48		48	48	0			M	51					1		1
Esp104_E	E	1	-0.801077	1	-0.199311	1	0.431433	1	-0.137408	pTa	PUNLMP	papillary	0	ND		0	47		47	57	0		BCG	M	45					1		1
Esp112_E	E	1	-0.903243	2	0.0105067	1	0.867256	1	-0.267884	pTa*	LOW*	papillary*	0	ND		0	47		47	47	0		BCG	M	57					1		1
Esp12_E	E	1	-0.126408	2	0.157466	2	0.118095	1	-0.20648	pTa	PUNLMP	papillary	0	ND		0	64		64	64	0			M	77					1		1
Esp15_E	E	1	-0.289313	2	0.0041399	2	0.133283	2	0.205931	pTa	PUNLMP	papillary	0	ND		0	64		64	64	0			M	70					1		1
Esp21_E	E	1	-0.26461	1	-0.0188747	2	0.0263692	1	-0.198599	pTa	PUNLMP	papillary	0	ND		0	61		61	61	0			M	74					1		1
Esp27_E	E	2	0.26571	2	0.0266483	3	0.29682	2	0.00299395	pT2	HIGH	papillary + solid		ND		0	0		0	22	2			M	77							1
Esp30_	E	1	-0.0720898	2	0.0804545	2	0.632469	2	0.11923	pTa	LOW	papillary	0	ND		0	62		62	0	0		BCG	M	71					1		1
Esp33_E	E	2	0.0317021	1	-0.125379	2	0.294097	2	0.25997	pT2*	HIGH*	?		ND		0	0		0	4	1											1
Esp34_E	E	1	-0.291504	2	0.000803703	1	0.172178	2	0.234911	pTa	LOW	papillary	0	ND		1	62		62	62	0			M	80					1		1
Esp37_E	E	1	-0.238848	1	-0.169621	2	0.106278	1	-0.156765	pTa	HIGH	papillary		ND		0	0		0	49	1		BCG	M	71							1
Esp38_E	E	2	0.161144	1	-0.532791	2	0.444899	2	0.485004	pTa	LOW	papillary	0	ND		1	59		59	59	0			F	68					1		1
Esp40_E	E	2	0.0146015	2	0.215966	2	0.288272	1	-0.0669363	pT2	HIGH	solid		ND		0	0		0	22	2			M	79							1
Esp46_E	E	1	-0.016877	2	0.14769	2	0.45431	1	-0.272297	pT1a	HIGH	papillary	1	ND		0	57		57	57	0		BCG	M	72					1		1
Esp49_E	E	1	-0.348675	1	-0.299747	2	0.0209362	1	-0.261226	pTa	LOW	papillary	0	ND		0	57		57	57	0		BCG	M	68					1		1
Esp52_E	E	1	-0.0137168	1	-0.403011	2	0.464751	1	-0.0154812	pTa	LOW	papillary	0	ND		0	56		56	56	0			M	73					1		1
Esp55_E	E	2	0.127078	2	0.208109	1	0.136661	1	-0.110086	pT2	HIGH	papillary + solid		ND		0	0		0	12	1			M	67							1
Esp58_E	E	1	-0.468571	1	-0.25165	1	0.133861	1	-0.138707	pTa	HIGH	papillary	1	ND		1	56		56	56	0			M	70					1		1
Esp61_E	E	1	-0.134646	1	-0.010339	1	0.0443813	2	0.0220516	pTa	LOW	papillary	0	ND		0	57		57	57	0			M	58					1		1
Esp64_E	E	1	-0.571692	1	-0.149102	1	0.690766	1	-0.0709396	pTa	PUNLMP	papillary	0	ND		1	42		42	42	0			M	64					1		1
Esp66_E	E	2	0.081944	1	-0.115078	2	1.24217	1	-0.198091	pT1	HIGH	papillary	1	ND		0	55		55	55	0		BCG	M	78					1		1
Esp69_E	E	2	0.154527	2	0.236109	1	0.141726	1	-0.0103025	pT2	HIGH	papillary		ND		0	0		0	1	1	cystectomy		M	75							1
Esp7_E	E	1	-0.104093	1	-0.327741	2	0.357162	1	-0.0651852	pTa	PUNLMP	papillary	0	ND		0	65		65	65	0			M	54					1		1
Esp80_E	E	1	-0.509657	1	-0.117747	1	1.53611	1	-0.034394	pTa	LOW	papillary		ND		0	0		0	6	2			M	57							1
Esp86_E	E	1	-0.0509156	2	0.190598	2	0.498438	1	-0.0454629	pT2	HIGH	papillary		ND		0	48		48	48	0	cystectomy		M	57							1
Esp9_E	E	2	0.10409	2	0.154651	2	0.276459	1	-0.0630668	pT2	HIGH	papillary		ND		0	57		57	57	0			M	69							1
Esp95_E	E	1	-0.691581	1	-0.0176744	1	0.934387	1	-0.329402	pTa	PUNLMP	papillary	0	ND		0	50		50	50	0		BCG	M	77					1		1
